# Supplementary material
Source: PubMed Central journal article supplement (PMC8604773)
Supplement: NIHMS1743381-supplement-2.pdf [file NIHMS1743381-supplement-2.pdf]

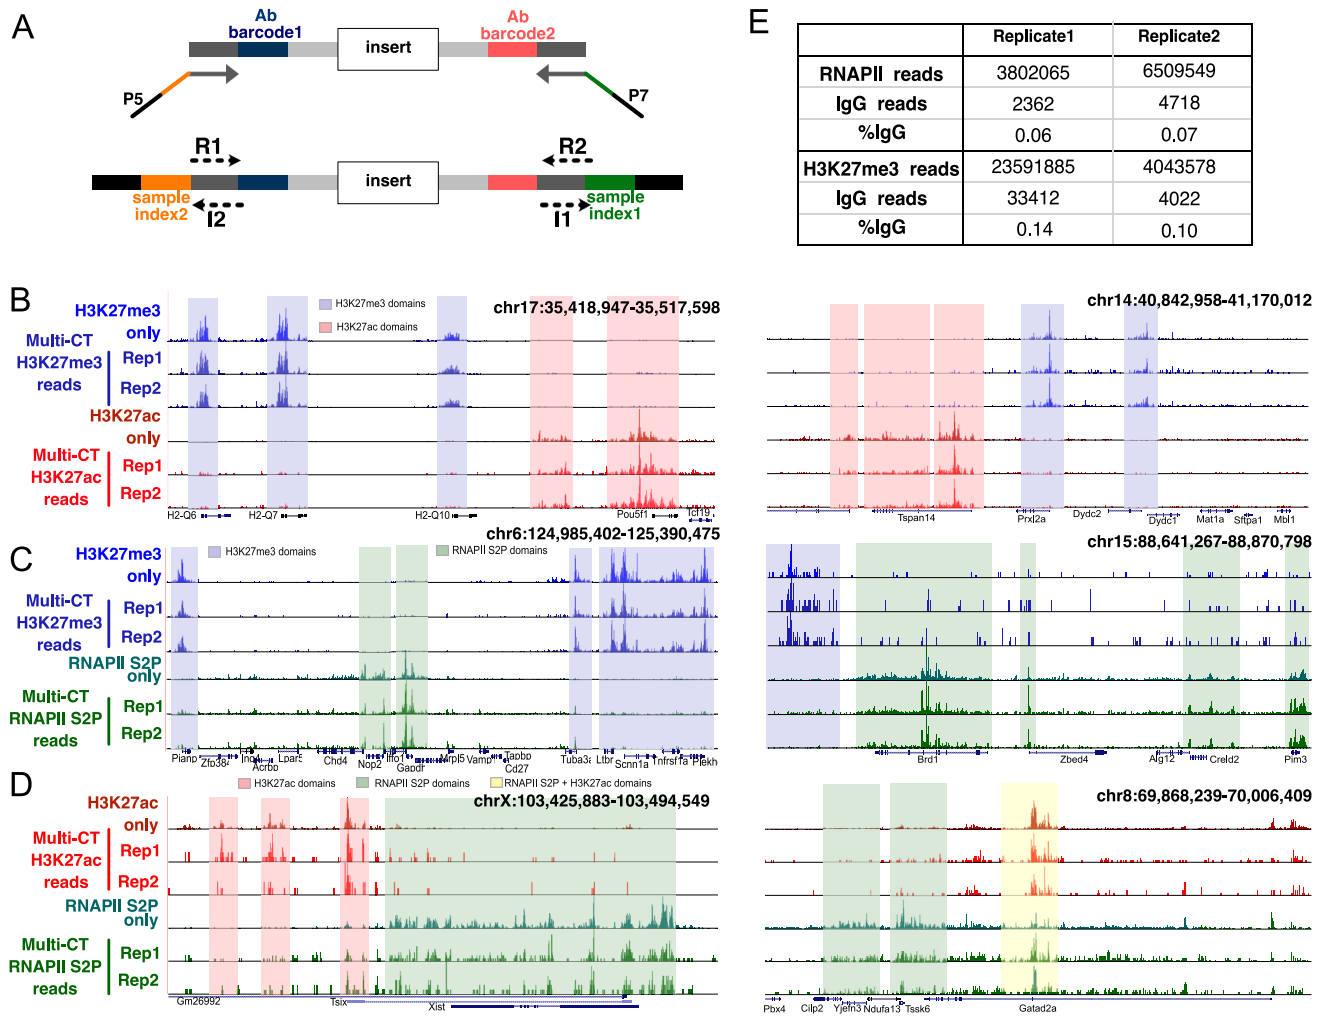

**Figure S1: Two Ab multi-CUT&Tag profiles, related to Figs. 1 and 2.**

**A**, Library construction and sequencing strategies for multi-CUT&Tag, depicting locations of Ab barcodes, sample indices, and sequencing primers for reads 1 and 2 (R1, R2) and index 1 and 2 (I1, I2) sequencing reads are shown. **B-D**, Genomic landscape showing single and double Ab multi-CUT&Tag profiles of H3K27me3+H3K27ac (B), H3K27me3+RNAPII S2P (C), and H3K27ac+RNAPII S2P (D). The shaded boxes represent domains enriched for the indicated epitopes. **E**, Table showing total aligned reads in double Ab multi-CUT&Tag profiles of RNAPII S2P+IgG and H3K27me3+IgG.

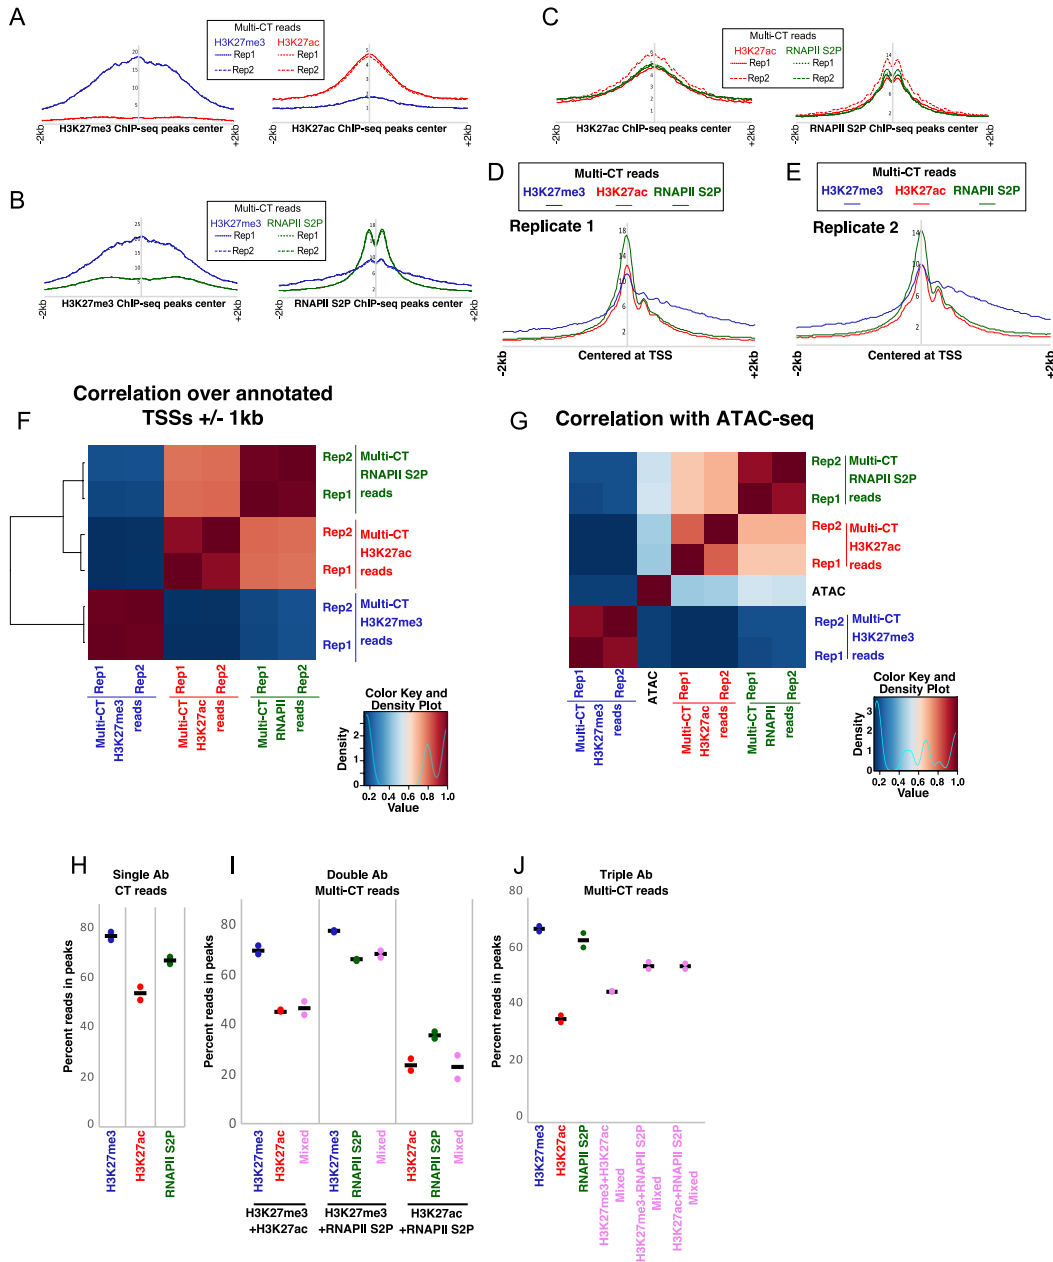

**Figure S2: Specificity of multi-CUT&Tag maps, related to Figs. 1 and 2.**

**A-C**, Average enrichment of reads from double Ab multi-CUT&Tag for H3K27me3+H3K27ac (A), H3K27me3+RNAPII S2P (B), and H3K27ac+RNAPII S2P (C) over published reads ChIP-seq peaks (as in Figure 1) corresponding to each epitope. **D-E**, Average enrichment of reads for each Ab from triple Ab multi-CUT&Tag for replicate 1 (D) and replicate 2 (E) over transcription start sites (TSS). **F**, Correlation matrix of triple Ab multi-CUT&Tag maps. Pearson correlations were calculated using the normalized read counts around annotated TSSs (+/- 1kb). **G**, Correlation matrix of ATAC-seq and triple Ab multi-CUT&Tag maps. Pearson correlations were calculated using the normalized read counts around all ATAC and triple Ab multi-CUT&Tag peaks (+/- 250bp). **H-J**, Percent reads for H3K27me3, H3K27ac and RNAPII S2P within peaks from single (G), double (H), and triple (I) Ab multi-CUT&Tag. Dots indicate individual replicates; lines indicate the means.

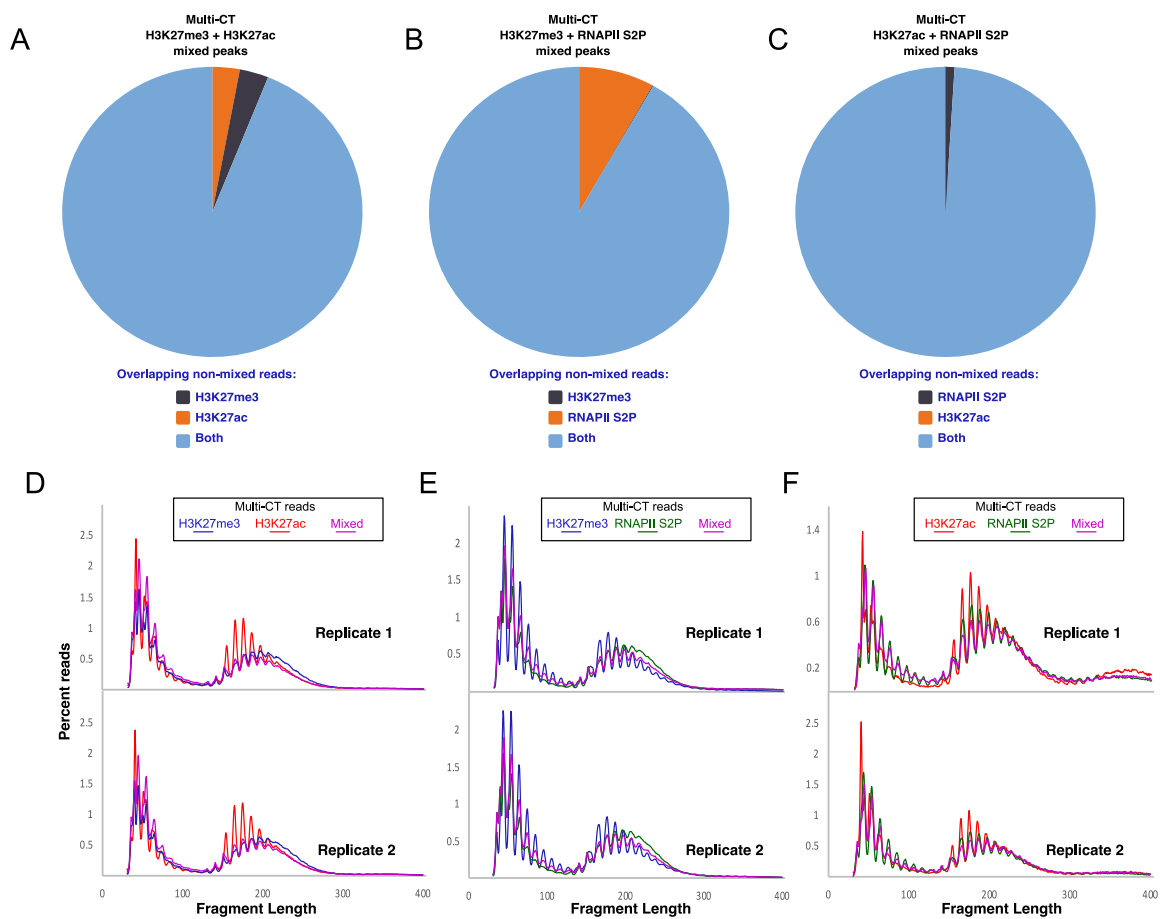

**Figure S3: Size distribution of reads from multi-CUT&Tag, related to Fig. 3.**

**A-C**, Pie chart showing homogenous reads in mixed peaks from double Ab multi-CUT&Tag for H3K27me3+H3K27ac (A), H3K27me3+RNAPII S2P (B), and H3K27ac+RNAPII S2P (C). **D-F**, Analysis of size distribution of homogeneous and mixed reads for both replicates from double Ab multi-CUT&Tag for H3K27me3+H3K27ac (D), H3K27me3+RNAPII S2P (E), and H3K27ac+RNAPII S2P (F).

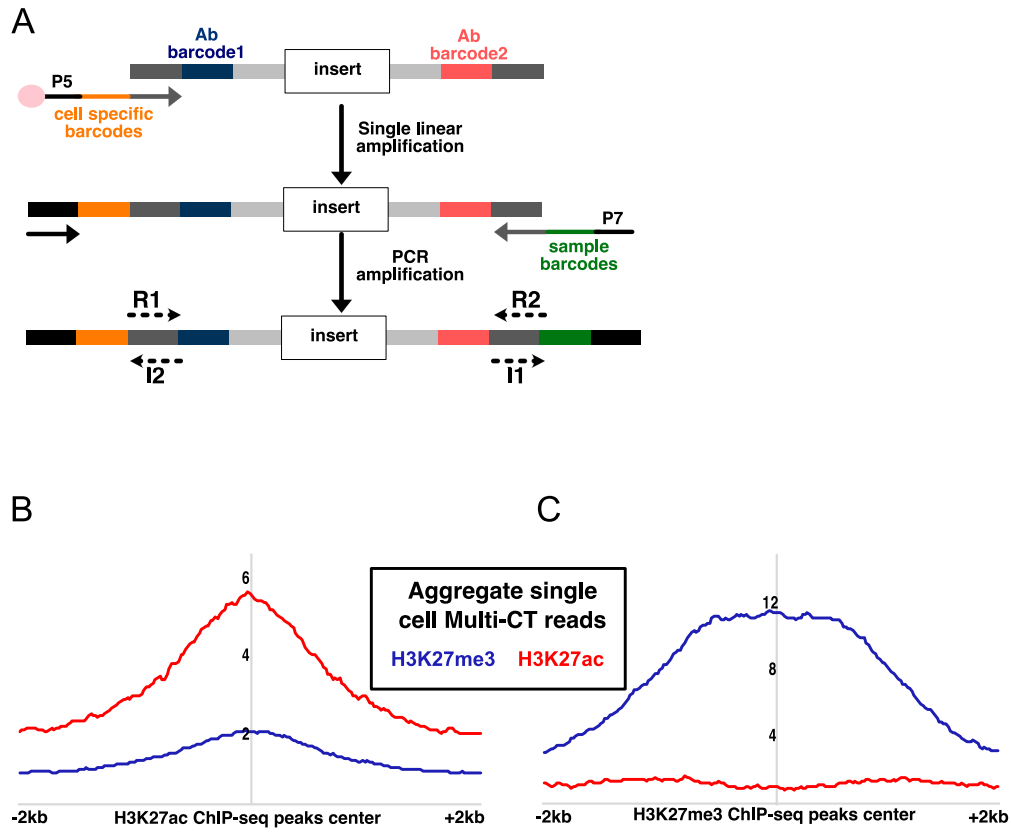

**Figure S4: Workflow and specificity of scMulti-CUT&Tag, related to Fig. 4.**

**A**, Library construction strategy for scMulti-CUT&Tag. The locations of cell specific barcodes (provided by 10X Genomics gel beads), Ab barcodes, sample barcodes, and sequencing primers for reads 1 and 2 (R1, R2) and index 1 and 2 (I1, I2) sequencing reads are shown. **B-C**, Average enrichment of reads from aggregate of scMulti-CUT&Tag over binding sites of H3K27me3 (B) and H3K27ac (C).

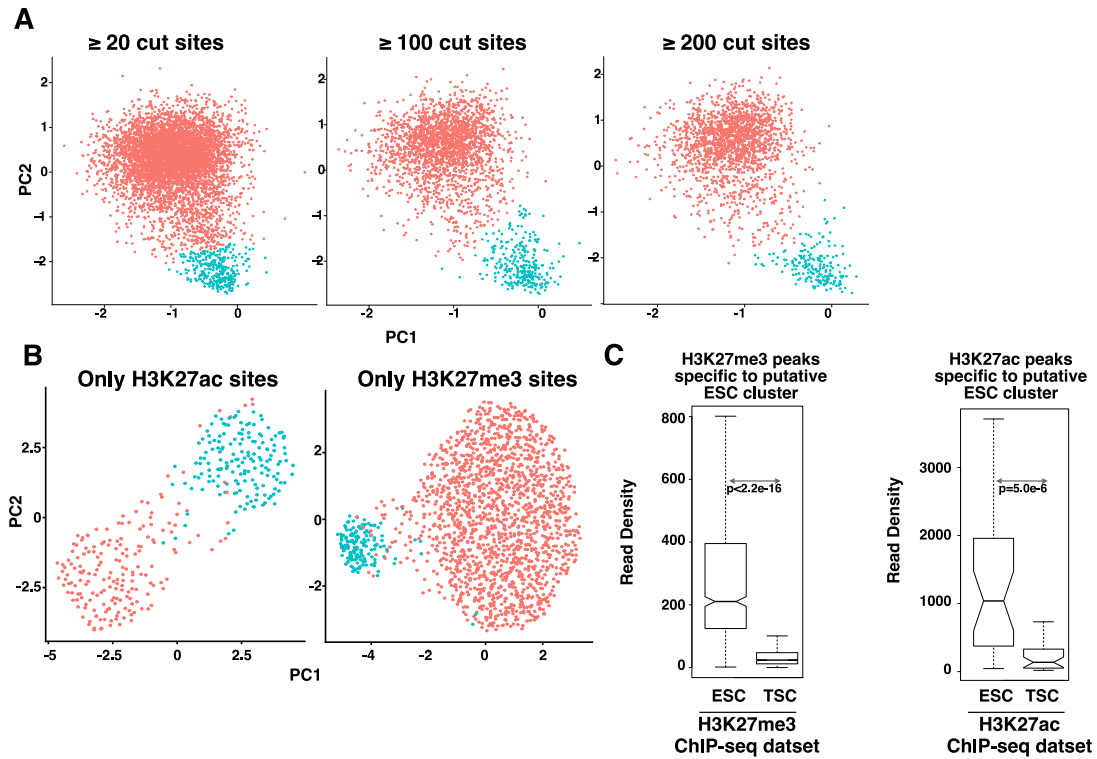

**Figure S5: Unbiased clustering of scMulti-CUT&Tag, related to Fig. 5.**

**A**, LSI plots showing cell type-specific clusters from cells with  $\geq 20$ ,  $\geq 100$ , and  $\geq 200$  unique reads. Clusters from higher thresholds were generally similar overall to clusters using lower thresholds, but higher thresholds generally increased separation of clusters at the expense of including fewer cells. **B**, LSI plots showing cell type-specific clusters from H3K27ac and H3K27me3 specific reads. **C**, Read density from independent ESC or TSC ChIP-seq datasets within ESC-specific peaks specific to each antibody from single-cell multi-CUT&Tag. Two-sided Wilcoxon Rank-Sum Tests were used to test for significance.

**Table S1. Oligonucleotides used in study, related to Fig. 1.**

| <b>Name</b>                   | <b>Function</b>                                          | <b>Sequence</b>                                                       |
|-------------------------------|----------------------------------------------------------|-----------------------------------------------------------------------|
| P5 i5 1 Universal Connector A | Barcoded oligo for loading to pA-Tn5 (used for H3K27ac)  | TCGTCGGCAGCGTCTCCACGCTATAGCCTGCGATCGAGGACGGCAGATGTGTATAAGAGACAG       |
| P5 i5 2 Universal Connector A | Barcoded oligo for loading to pA-Tn5 (used for RNAP II)  | TCGTCGGCAGCGTCTCCACGCTATAGAGCGCGATCGAGGACGGCAGATGTGTATAAGAGACAG       |
| P5 i5 3 Universal Connector A | Barcoded oligo for loading to pA-Tn5 (used for H3K27me3) | TCGTCGGCAGCGTCTCCACGCCATCTCTGCGATCGAGGACGGCAGATGTGTATAAGAGACAG        |
| P5 i5 4 Universal Connector A | Barcoded oligo for loading to pA-Tn5 (used for IgG)      | TCGTCGGCAGCGTCTCCACGGGCTCTGAGCGATCGAGGACGGCAGATGTGTATAAGAGACAG        |
| P7 i7 1 Universal Connector B | Barcoded oligo for loading to pA-Tn5 (used for H3K27ac)  | GTCTCGTGGGCTCGGCTGTCCCTGTCCCAGTAATCACCGTCTCCGCCTCAGATGTGTATAAGAGACAG  |
| P7 i7 2 Universal Connector B | Barcoded oligo for loading to pA-Tn5 (used for RNAP II)  | GTCTCGTGGGCTCGGCTGTCCCTGTCTCTCCGGACACCGTCTCCGCCTCAGATGTGTATAAGAGACAG  |
| P7 i7 3 Universal Connector B | Barcoded oligo for loading to pA-Tn5 (used for H3K27me3) | GTCTCGTGGGCTCGGCTGTCCCTGTCCAATGAGCGCACCGTCTCCGCCTCAGATGTGTATAAGAGACAG |
| P7 i7 4 Universal Connector B | Barcoded oligo for loading to pA-Tn5 (used for IgG)      | GTCTCGTGGGCTCGGCTGTCCCTGTCCGGAATCTCCACCGTCTCCGCCTCAGATGTGTATAAGAGACAG |
| Tn5MErev                      | Reverse Primer for loading to pA-Tn5                     | [phos]CTGTCTTTATACACATCT                                              |
| Read1                         | Custom read1 primer for multi-CUT&Tag                    | TCGTCGGCAGCGTCTCCACGC                                                 |
| Read2                         | Custom read2 primer for multi-CUT&Tag                    | GTCTCGTGGGCTCGGCTGTCCCTGTCC                                           |
| Index1                        | Custom Index1 primer for multi-CUT&Tag                   | GGACAGGGACAGCCGAGCCCACGAGAC                                           |
| Index2                        | Custom Index2 primer for multi-CUT&Tag                   | GCGTGGAGACGCTGCCGACGA                                                 |
| PE read1                      | Read1 for sequencing phiX                                | ACACTCTTTCCCTACACGACGCTCTTCCGATCT                                     |
| PE read2                      | Read2 for sequencing phiX                                | CGGTCTCGGCATTCTGCTGAACCGCTCTCCGATCT                                   |

**Table S2. Read counts for multi-CUT&Tag libraries, related to STAR Methods.**

| <b>Experiment</b> | <b>Raw reads</b> | <b>Epitopes</b>                 |
|-------------------|------------------|---------------------------------|
| DoubleAb_AM_rep1  | 15670828         | H3K27ac, H3K27me3               |
| DoubleAb_AM_rep2  | 23210456         | H3K27ac, H3K27me3               |
| DoubleAb_AP_rep1  | 7890307          | H3K27ac, RNAPII_Ser2P           |
| DoubleAb_AP_rep2  | 3529709          | H3K27ac, RNAPII_Ser2P           |
| DoubleAb_PM_rep1  | 25779060         | RNAPII_Ser2P, H3K27me3          |
| DoubleAb_PM_rep2  | 33124783         | RNAPII_Ser2P, H3K27me3          |
| TripleAb_APM_rep1 | 32863407         | H3K27ac, RNAPII_Ser2P, H3K27me3 |
| TripleAb_APM_rep2 | 63496502         | H3K27ac, RNAPII_Ser2P, H3K27me3 |
| SingleAb_P_rep1   | 14977230         | RNAPII_Ser2P                    |
| SingleAb_P_rep2   | 20828490         | RNAPII_Ser2P                    |
| SingleAb_M_rep1   | 7135724          | H3K27me3                        |
| SingleAb_M_rep2   | 10287107         | H3K27me3                        |
| SingleAb_A_rep1   | 21970708         | H3K27ac                         |
| SingleAb_A_rep2   | 19275066         | H3K27ac                         |
| SingleCell_AM     | 288336450        | H3K27ac, H3K27me3               |
| DoubleAb_IM_rep1  | 30457152         | IgG, H3K27me3                   |
| DoubleAb_IM_rep2  | 6077676          | IgG, H3K27me3                   |
| DoubleAb_IP_rep1  | 10753883         | IgG, RNAPII_Ser2P               |
| DoubleAb_IP_rep2  | 11345061         | IgG, RNAPII_Ser2P               |

## Methods S1. Detailed Multi-CUT&Tag Protocol, related to STAR Methods.

### Multi-CUT&Tag Protocol

#### Buffers to be made:

- 1) **10X Annealing buffer:** 100 mM HEPES pH 7.2, 500 mM NaCl, 10 mM EDTA.
- 2) **Binding buffer:** 20 mM HEPES pH 7.5, 10 mM KCl, 1 mM CaCl<sub>2</sub>, 1 mM MnCl<sub>2</sub>.
- 3) **Wash Buffer:** 20 mM HEPES pH 7.5, 150 mM NaCl, 0.5 mM Spermidine, 1× Protease inhibitor cocktail.
- 4) **Dig-wash Buffer:** 20 mM HEPES pH 7.5, 150 mM NaCl, 0.5 mM Spermidine, 0.05% Digitonin, 1× Protease inhibitor cocktail.
- 5) **Dig-med Buffer:** 20 mM HEPES pH 7.5, 300 mM NaCl, 0.5 mM Spermidine, 0.01% Digitonin, 1× Protease inhibitor cocktail.

#### Step 1: Loading pA-Tn5 with barcoded adapters.

- 1) In a PCR tube 'A', add 9 ul of 100 uM P5\_i5\_1\_Universal\_Connector\_A, 9 ul of Tn5MErev and 2 ul of 10X annealing buffer.
- 2) In tube 'B', add 9 ul 100 uM P7\_i7\_1\_Universal\_Connector\_B, 9 ul of 100 uM Tn5MErev, and 2 ul 10X annealing buffer.
- 3) To anneal the adapters, heat tubes to 95 °C for 1 minute and slowly ramp down to 25 °C. Hold at 25 °C.
- 4) Then mix tube A and B (45 uM Mixed Annealed Tn5 Adapters).
- 5) Heat ~100 ul of 100% glycerol to 90 °C in thermocycler or heat block. Pipet 35 ul heated 100% glycerol to new tube and cool on ice.
- 6) Add 35 ul of 45 uM Annealed Tn5 Adapters to cooled 100% glycerol and flick to mix.
- 7) Add 25 ul of 21.1 uM N-terminal 6-histidine (6-His) tagged pA-Tn5. Mix gently by flicking.
- 8) Incubate at RT for 60 minutes with occasional gentle flicking and then store the loaded pA-Tn5 enzyme at -20 °C.

#### Step 2: Coupling antibody of interest with loaded pA-Tn5.

- 1) Mix ~20 µL of loaded pA-Tn5 with ~40 µL of antibody of interest, aiming for approximately 2:1 pA-Tn5:Ab molar ratio.
- 2) Incubate overnight for binding at 4 °C in a nutating mixer.
- 3) Take 80 µL of Dynabeads His-Tag Isolation and Pulldown (Invitrogen, 10103D) and wash the beads with phosphate buffered saline (PBS).
- 4) Add the washed beads in 20 µL PBS to the tube containing pA-Tn5 and antibody.
- 5) Keep for 2-3 hours for binding at 4 °C in a nutating mixer.
- 6) Wash the beads in 200 µL of PBS. Repeat the wash step twice.
- 7) To elute the antibody-pA-Tn5 complex, add 100 µL of 300mM Imidazole in PBS. Incubate at 4 °C for 1 hour, in a nutating mixer.
- 8) Perform buffer exchange using Amicon Ultra- 0.5mL Centrifugal filters (Millipore, UFC501096) following the manufacturer's protocol.
- 9) The purified antibody-pA-Tn5 complexes can be stored at -20 °C in PBS + 50% glycerol.



## **Bulk multi-CUT&Tag**

### **Step 3: Binding the cells to Concanavalin A-coated beads.**

- 1) Resuspend Concanavalin A coated magnetic beads (Polysciences) and use ~10  $\mu\text{L}$  of beads for 100,000 cells.
- 2) Wash the Concanavalin A coated beads twice in Binding buffer to activate the beads.
- 3) Trypsinize cells to single cell suspension and wash in PBS. We used ~100,000 cells for each multi-CUT&Tag bulk experiment.
- 4) Wash the cells in Wash buffer. Resuspend in 0.5 mL wash buffer and add the activated Concanavalin A coated beads.
- 5) Incubate cells/beads for 15 minutes at room temperature in an end-over-end rotator.

### **Step 4: Incubating permeabilized cells with purified antibody-pA-Tn5 complex(es).**

- 1) Place the tube containing Concanavalin A coated beads bound cells on a magnetic stand until the solution clears and carefully remove liquid by pipetting.
- 2) Resuspend cells in 100  $\mu\text{L}$  cold Dig-wash Buffer containing 2 mM EDTA.
- 3) Add 2  $\mu\text{g}$  of each differentially barcoded purified antibody-pA-Tn5 complex to the cells.
- 4) Place on nutator at 4  $^{\circ}\text{C}$  for overnight incubation.

### **Step 5: Tagmentation**

- 1) Wash the cells with 1 mL of Dig-med Buffer. Repeat the wash step two additional times.
- 2) Add 300  $\mu\text{L}$  Dig-med Buffer containing 10 mM  $\text{MgCl}_2$  while gently vortexing.
- 3) Incubate at 37  $^{\circ}\text{C}$  for 1 hr.

### **Step 6: Purification of DNA.**

- 1) To stop tagmentation and solubilize DNA fragments, add 10  $\mu\text{L}$  0.5M EDTA, 3  $\mu\text{L}$  10% SDS and 1  $\mu\text{L}$  of 20 mg/mL Proteinase K to each sample.
- 2) Vortex on full speed and incubate for 1 hr at 50  $^{\circ}\text{C}$ .
- 3) Add 300  $\mu\text{L}$  of Phenol-Chloroform-Isoamyl alcohol to the tube and mix by full-speed vortexing. Transfer to a phase-lock tube, and centrifuge for 3 min room temperature at 16000 g.
- 4) Add 300  $\mu\text{L}$  chloroform to the aqueous phase and centrifuge for 5 min at 16000 g.
- 5) Remove aqueous phase to a new tube and add 750  $\mu\text{L}$  of 100% ethanol and 0.5  $\mu\text{g}/\mu\text{L}$  glycogen to it. Incubate at -20  $^{\circ}\text{C}$  for 15 mins and centrifuge for 15 min at 4  $^{\circ}\text{C}$  at 16000 g.
- 6) Carefully remove the liquid without disturbing the pellet. Wash the pellet in 1 mL 100% ethanol.
- 7) After air drying the pellet, dissolve it in 23 $\mu\text{L}$  of 10 mM Tris-HCl pH8 containing 1/100 RNase A. Incubate for 10 min at 37  $^{\circ}\text{C}$ .

### **Step 7: PCR amplification of multi-CUT&Tag library.**

- 1) To 21  $\mu\text{L}$  of purified DNA, add 2  $\mu\text{L}$  each of the barcoded i5 primer (10  $\mu\text{M}$ ) and i7 primers, using a different combination for each sample. Add 25  $\mu\text{L}$  of NEBNext HiFi 2x PCR Master mix and mix gently.
- 2) Place in a thermocycler with the following program.  
Step 1: 72  $^{\circ}\text{C}$  for 5 min  
Step 2: 98  $^{\circ}\text{C}$  for 30 sec  
Step 3: 98  $^{\circ}\text{C}$  for 10 sec  
Step 4: 63  $^{\circ}\text{C}$  for 10 sec  
Repeat Steps 3-4: 17 times  
Step 5: 72 $^{\circ}\text{C}$  for 1 min  
Step 6: Hold at 8  $^{\circ}\text{C}$

### **Step 8: Post PCR cleanup.**

- 1) Add 55  $\mu\text{L}$  Ampure XP beads (1.1 volumes) and mix by pipetting. Incubate at room temperature 10 min.
- 2) Place on magnet and withdraw the liquid. Without disturbing the beads, wash the beads twice with 200  $\mu\text{L}$  of 80% ethanol.

- 3) Perform a quick spin, replace tubes on the magnet, remove all liquid, and air dry the beads for 2-3 min.
- 4) Add 25  $\mu$ L 10 mM Tris-HCl pH 8 to the beads and vortex on full. Incubate at room temperature for 5 minutes.
- 5) Place on magnet and withdraw the liquid to a fresh tube.
- 6) Determine the size distribution (by Fragment analyzer) and concentration (by Qubit or KAPA Library Quantification Kit (Roche)) of the libraries before sequencing.

## **Single cell multi-CUT&Tag**

### **Step 3: Incubating permeabilized cells with purified antibody-pA-Tn5 complex(es).**

- 1) ESCs and TSCs were trypsinized and washed in PBS. ~200,000 cells were used as starting material.
- 2) Wash the cells in Wash buffer. Resuspend cells in 100  $\mu$ L cold Dig-wash Buffer containing 2 mM EDTA.
- 3) Add 4  $\mu$ g of each differentially barcoded purified antibody-pA-Tn5 complex to the cells.
- 4) Place on nutator at 4 °C for overnight incubation for antibodies to bind to chromatin.

### **Step 4: Tagmentation**

- 1) Wash the cells with 1 mL of Dig-wash Buffer. Pellet the cells at 600 g for 3 minutes at 4°C and discard the supernatant. Repeat the wash step 3 times.
- 2) Count the cells again during the last wash, as some cells are lost during the wash steps.
- 3) Resuspended cells in Dig-med Buffer at 5000cells/ $\mu$ L and incubate on ice for 5 minutes.
- 4) To start tagmentation, add an equal volume of Dig-med Buffer containing 20 mM MgCl<sub>2</sub> and incubate samples at 37 °C for 1 hour.
- 5) After one hour, 2.5  $\mu$ L of the tagmentation reaction (2500 cells/ $\mu$ L) are used for a targeted cell recovery of 4000 cells and mixed with 2.5  $\mu$ L of Diluted Nuclei Buffer, 7  $\mu$ L of ATAC buffer (both from the Chromium Single Cell ATAC Reagent Kit, 10X Genomics), 3  $\mu$ L of 50% glycerol and 0.5  $\mu$ L of 5M NaCl.

### **Step 5: GEM Generation & Barcoding (according to manufacturer's protocol).**

- 1) Barcoding master mix was prepared by mixing 61.5  $\mu$ L of barcoding reagent, 1.5  $\mu$ L of Reducing Agent B and 2  $\mu$ L of barcoding enzyme.
- 2) Load the samples and Gel beads to Chromium Chip E following 10X Genomics' User protocol. GEMs were transferred to a PCR tube.
- 3) Incubate the GEMs in a thermocycler with following program:
  - Step 1: 72 °C for 5 min
  - Step 2: 98 °C for 30 sec
  - Step 3: 98 °C for 10 sec
  - Step 4: 59 °C for 10 sec
  - Step 5: 72°C for 1 min
  - Step 6: Hold at 15 °C

**Note:** the use of a single amplification cycle at this step differs from the manufacturer's recommendations for scATAC-seq, which recommends >10 cycles of linear amplification to introduce cell-specific barcodes. We found that elimination of all but one amplification cycle at this step was necessary to prevent incorporation of uninserted Tn5 adapters into libraries.

### **Step 6: Post GEM Incubation Cleanup (according to manufacturer's protocol).**

- 1) Post GEM cleanup was performed first using Dynabeads MyOne SILANE according to 10X Genomics' ATAC seq protocol.
- 2) Perform another round of cleanup using Ampure XP beads according to 10X Genomics' ATAC seq protocol.

### **Step 7: Single cell multi-CUT&Tag library construction (according to manufacturer's protocol).**

- 1) Construct libraries using sample indexing primers (Single Index Kit, 10X Genomics), by performing 14 cycles of PCR according to manufacturer's protocol.
- 2) Perform a double-sided size selection post sample index PCR using Ampure XP beads according to manufacturer's protocol.
- 3) Determine the size distribution (by Fragment analyzer) and concentration (by Qubit or KAPA Library Quantification Kit (Roche)) of the libraries before sequencing.

### **Sequencing of multi-CUT&Tag libraries.**

- 1) Paired-end sequencing was performed on an Illumina NextSeq 500
- 2) Custom read and index primers (Sup. Table 1) were used and the sequencing parameters were as follows: read 1—72 cycles, read 2—72 cycles, index 1—8 cycles, index 2—8 cycles (for bulk multi-CUT&Tag) or 16 cycles (for sc multi-CUT&Tag).
- 3) PhiX DNA was added to 20-30%, due to the sequence homogeneity of the initial sequencing cycles, which read through regions of the adapter that are identical in all reads.
